# Supplementary material for: Some Phthalocyanine and Naphthalocyanine Derivatives as Corrosion Inhibitors for Aluminium in Acidic Medium: Experimental, Quantum Chemical Calculations, QSAR Studies and Synergistic Effect of Iodide Ions
Source: PubMed Central journal article supplement (PMC6332286; doi:10.3390/molecules200915701), 2015-08-28
Supplement: molecules-20-15701-s001.pdf [file molecules-20-15701-s001.pdf]

# Supplementary Materials

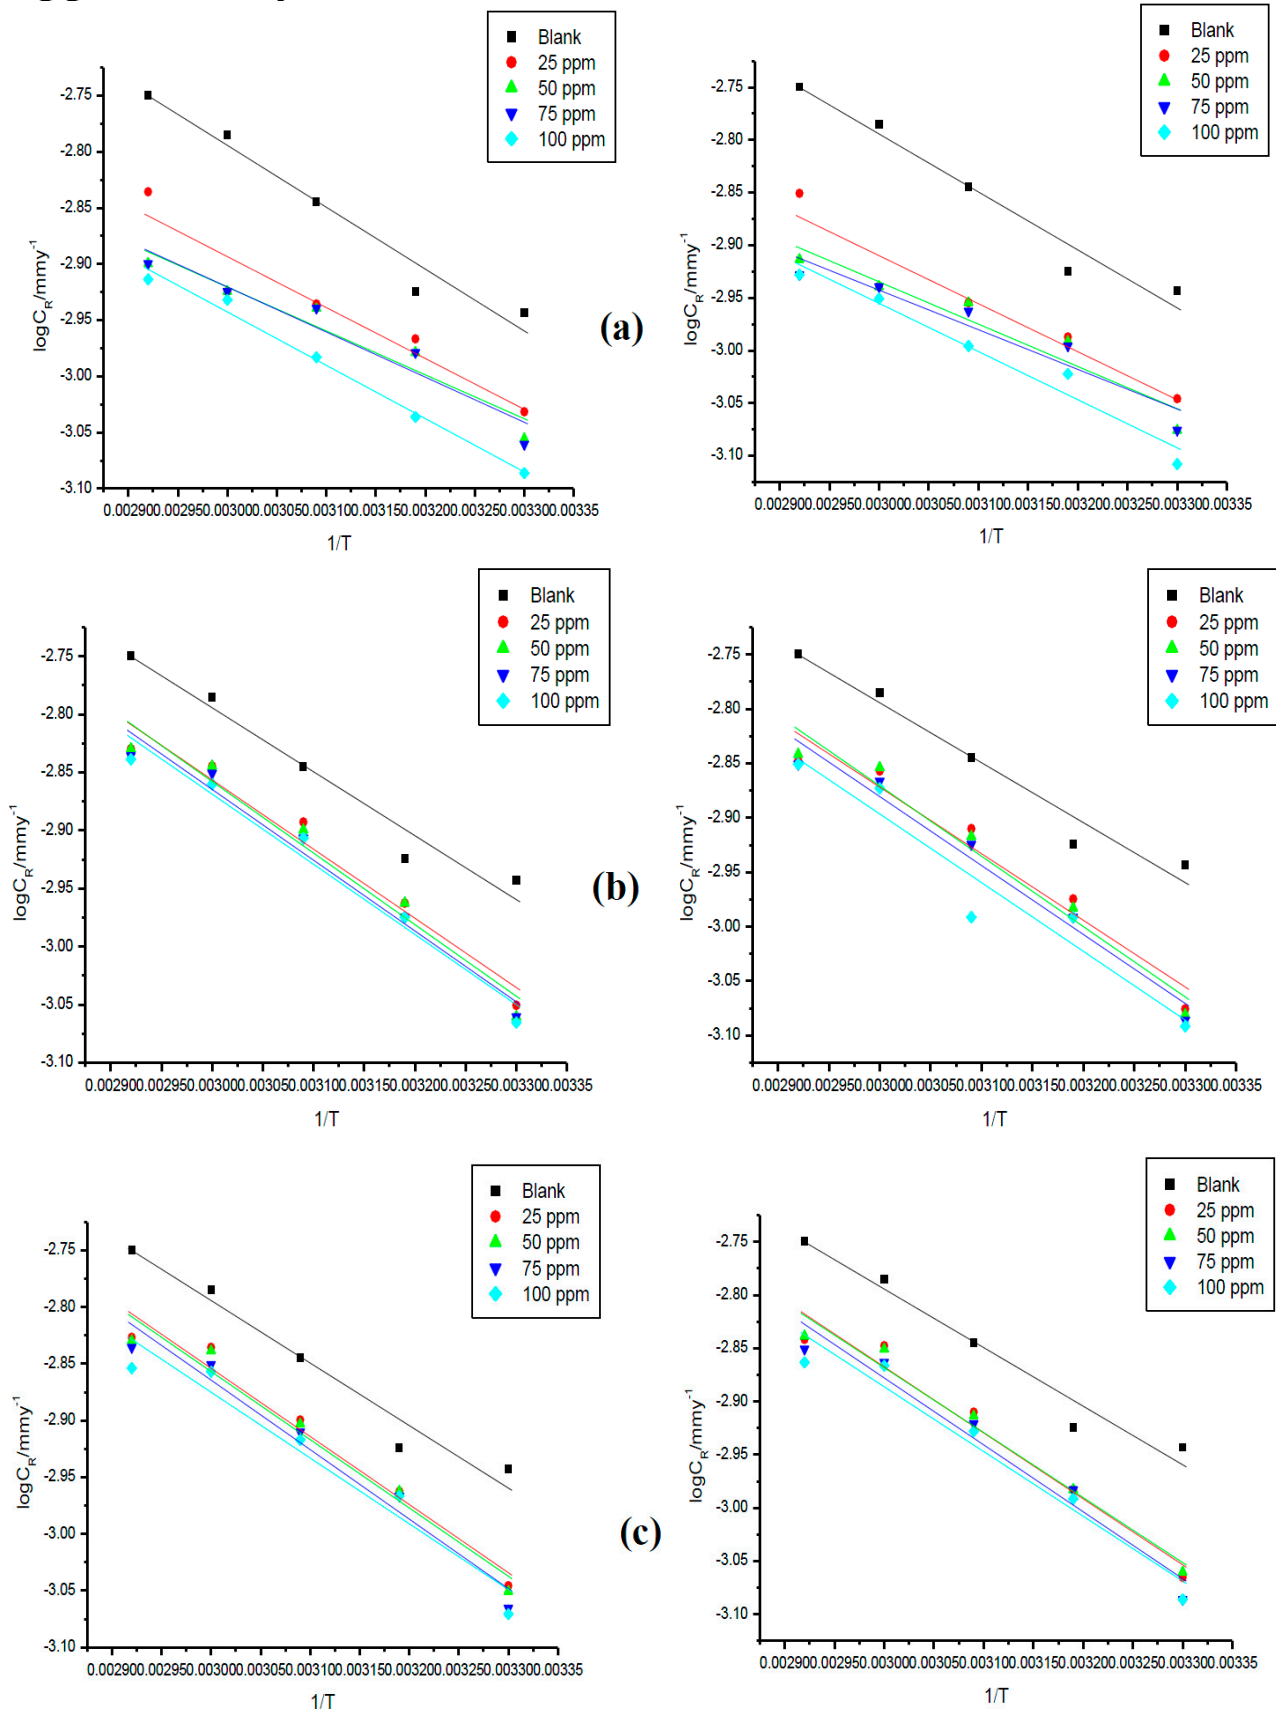

Figure S1. Cont.

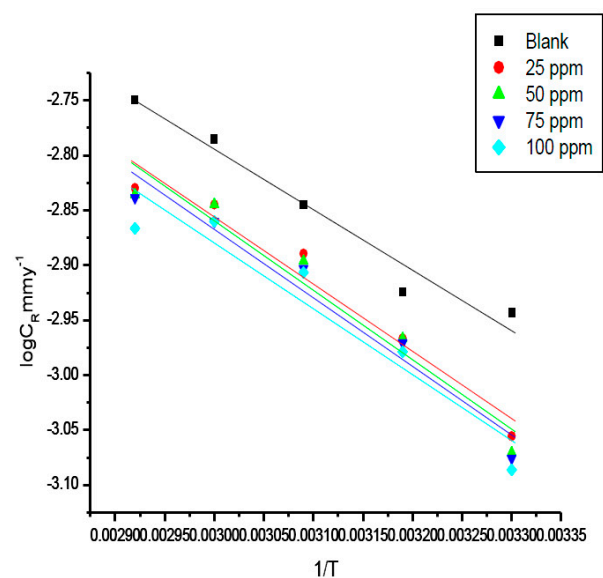

(d)

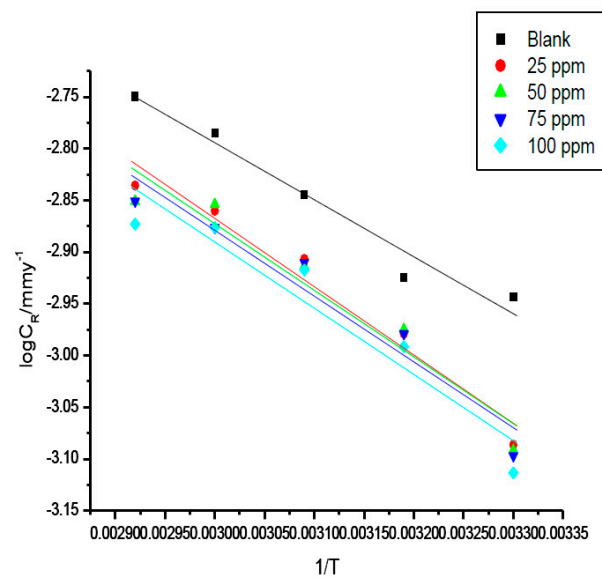

(e)

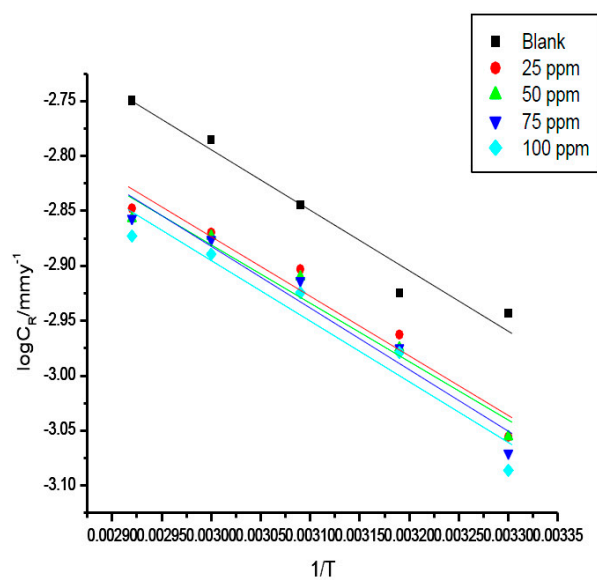

(f)

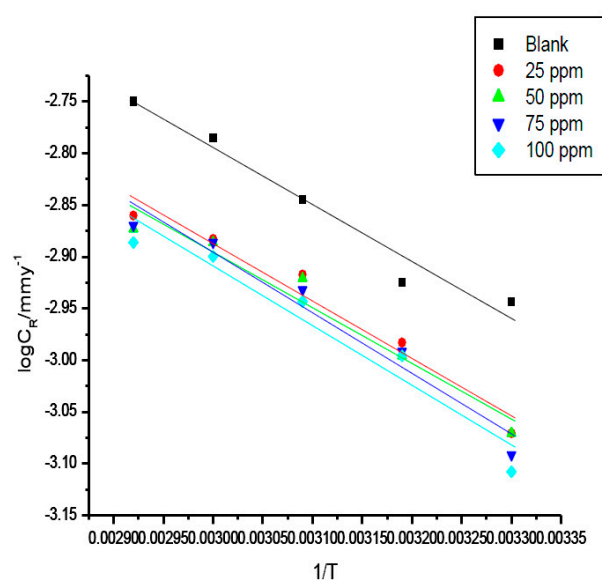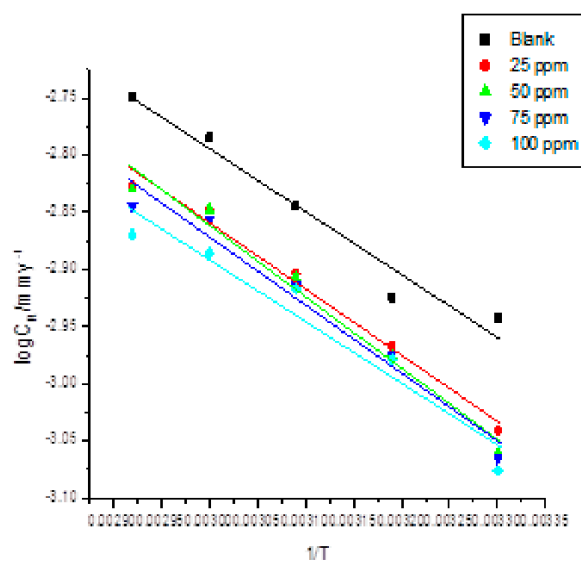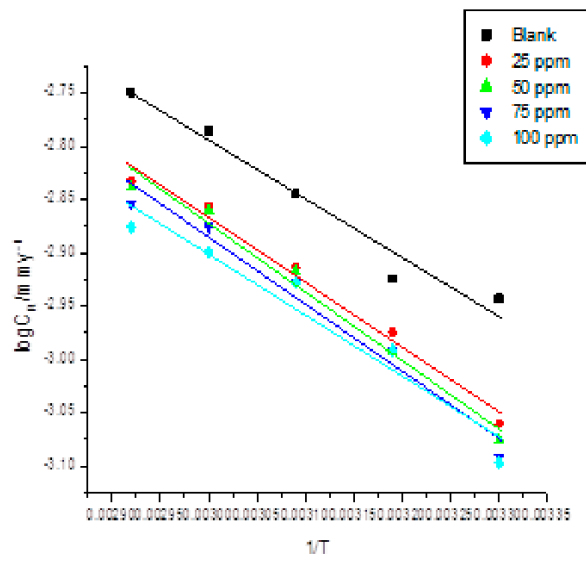

Figure S1. Cont.

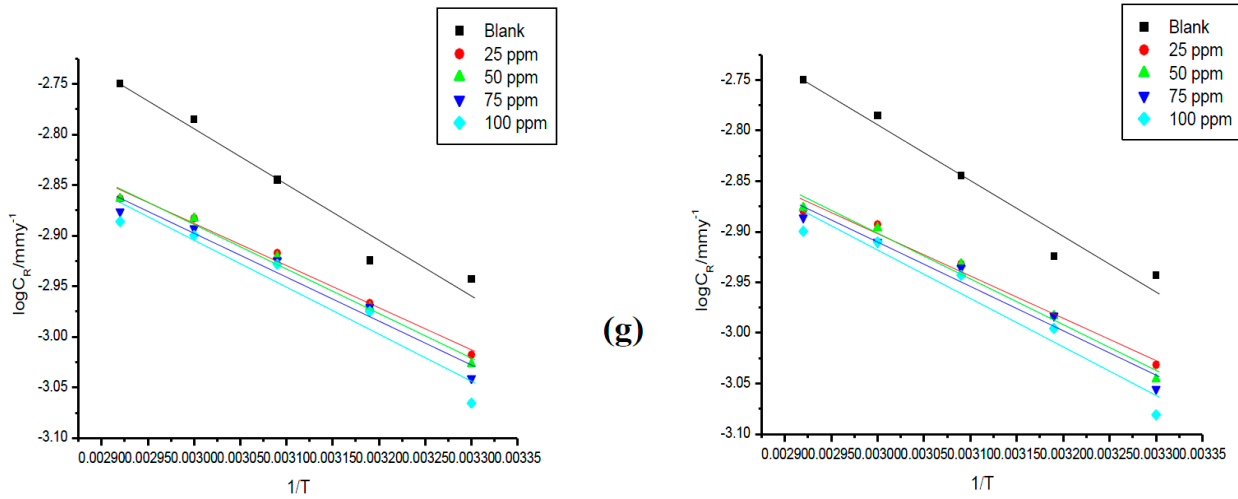

**Figure S1.** Arrhenius plots ( $\log C_R$  vs.  $1/T$ ) for Al corrosion in 1 M HCl in the absence and presence of different concentrations of (a) Pc1; (b) Pc2; (c) Pc3; (d) Pc4; (e) nPc1; (f) nPc2; and (g) nPc3; without KI (left hand side) and with KI (right hand side).

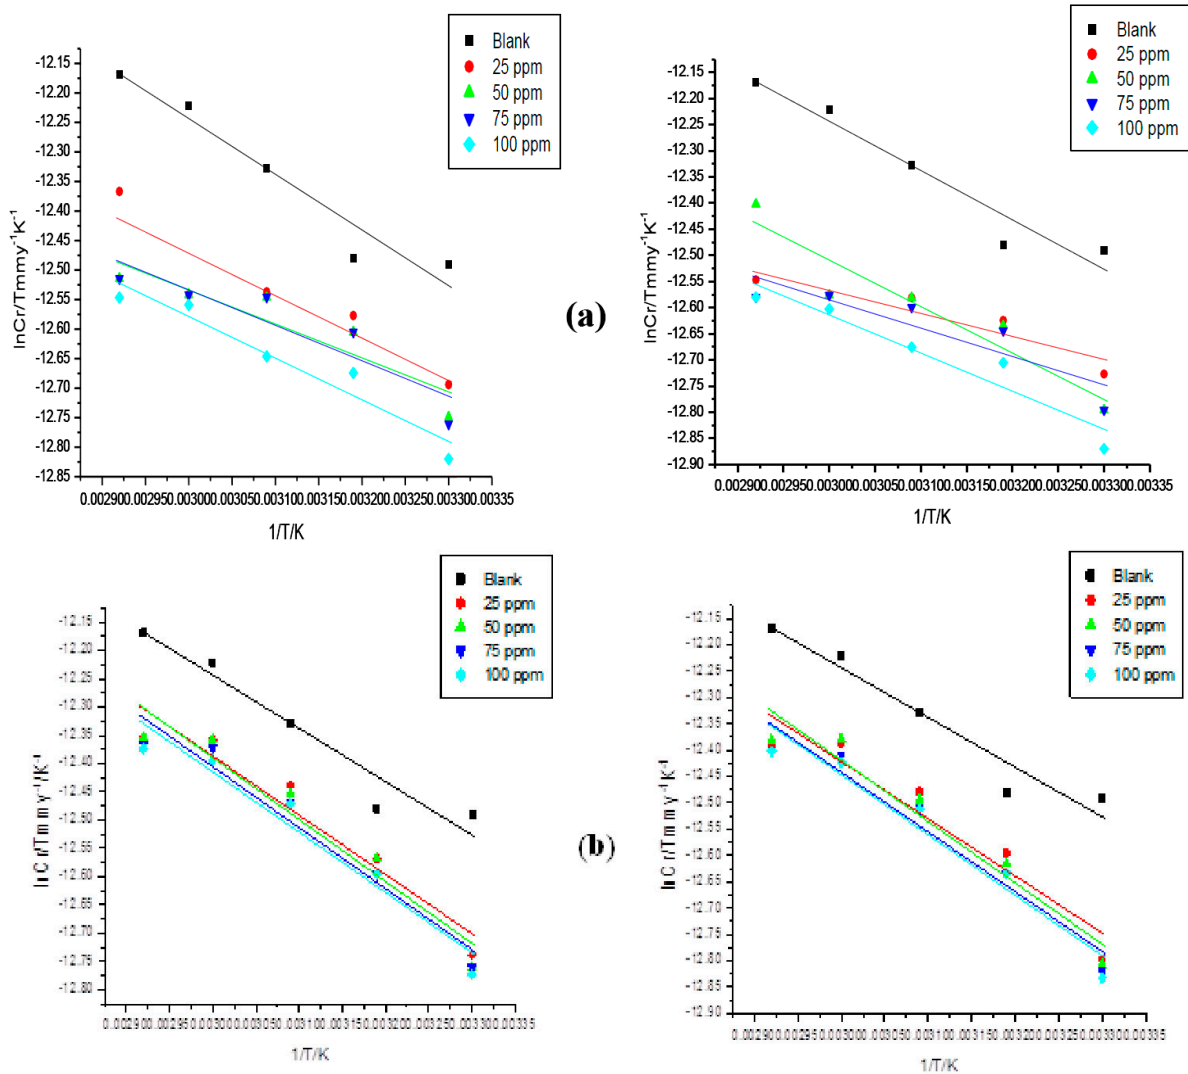

**Figure S2. Cont.**

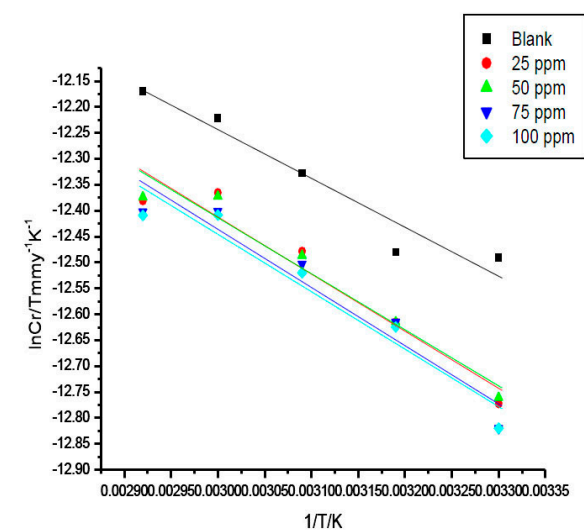

(c)

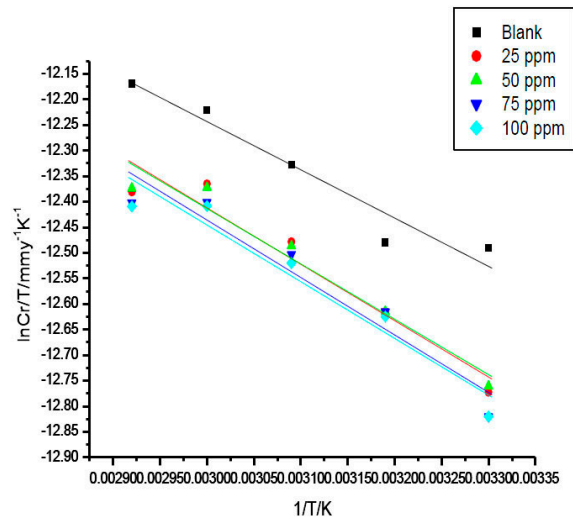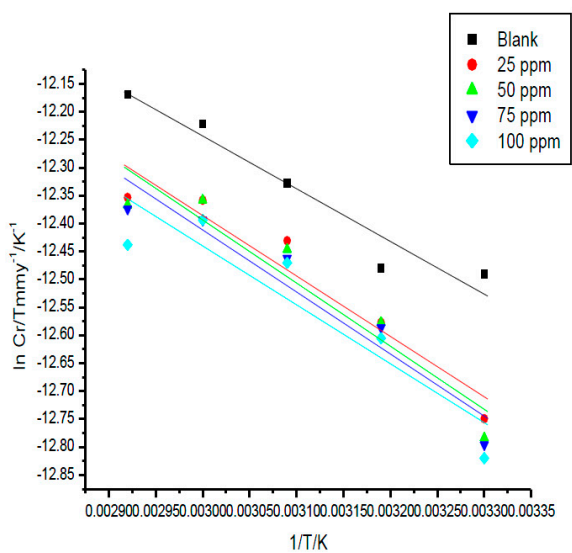

(d)

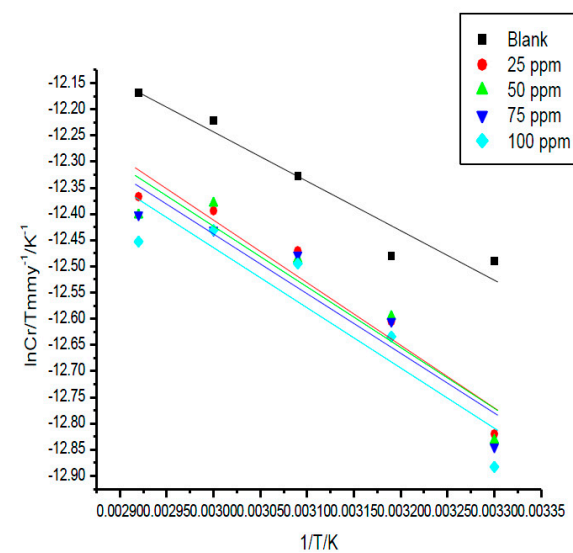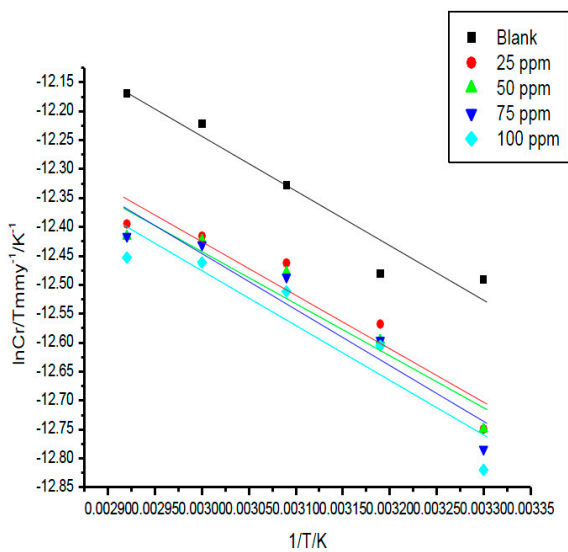

(e)

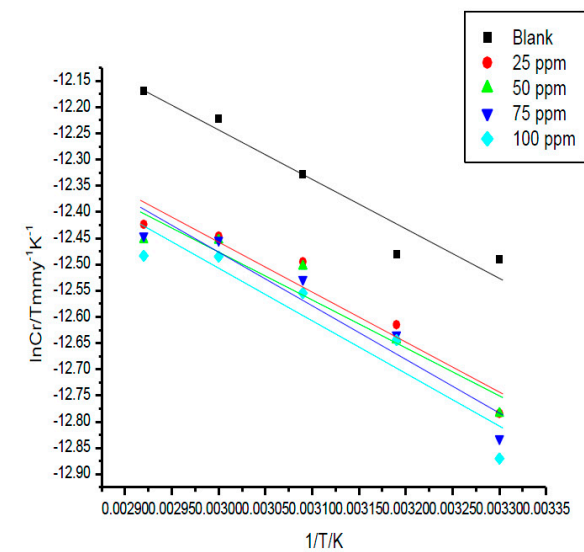

Figure S2. Cont.

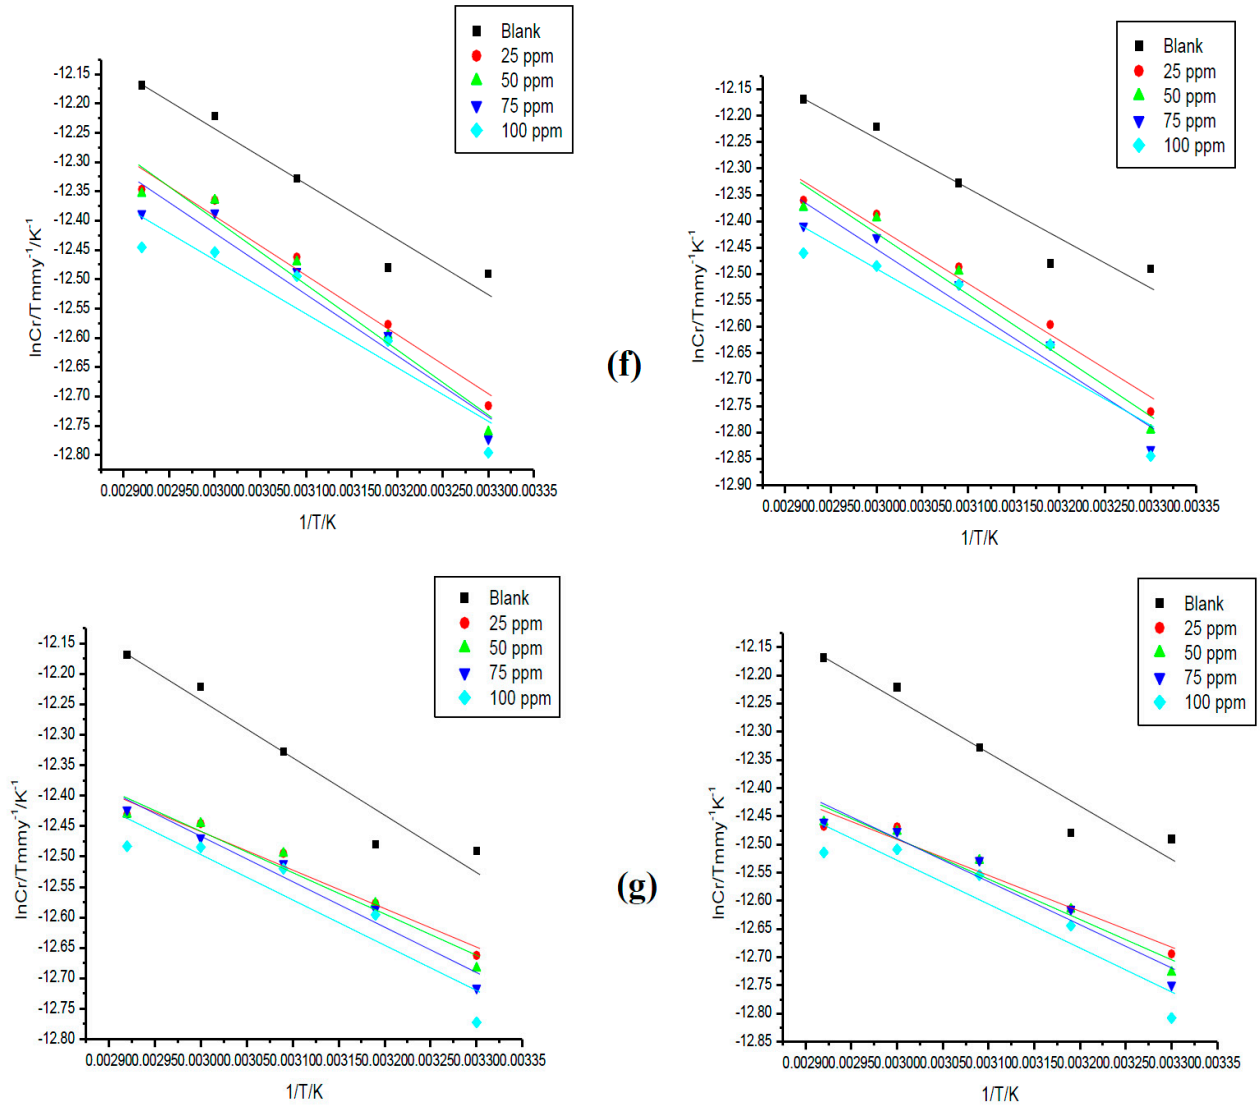

**Figure S2.** The transition state plots ( $\log CR/T$  vs.  $1/T$ ) for Al corrosion in 1 M HCl in the absence and presence of different concentrations of (a) Pc1; (b) Pc2; (c) Pc3; (d) Pc4; (e) nPc1; (f) nPc2; and (g) nPc3; without KI (left hand side) and with KI (right hand side).

**Table S1.** Slopes and standard deviations (SD) for the Arrhenius plots (log CR vs. 1/T) for Al corrosion in 1 M HCl in the absence and presence of different concentrations of the studied compounds without and with KI.

| Inhibitor | Without KI  |                            |                         | With KI                    |                         |
|-----------|-------------|----------------------------|-------------------------|----------------------------|-------------------------|
|           | Conc. (ppm) | Slope ( $\times 10^{-2}$ ) | SD ( $\times 10^{-3}$ ) | Slope ( $\times 10^{-2}$ ) | SD ( $\times 10^{-3}$ ) |
| Blank     | -           | 3.411                      | 7.740                   | -                          | -                       |
| Pc1       | 25          | 2.319                      | 6.240                   | 2.242                      | 6.190                   |
|           | 50          | 1.942                      | 0.790                   | 1.928                      | 0.938                   |
|           | 75          | 1.854                      | 0.796                   | 1.794                      | 0.694                   |
|           | 100         | 2.072                      | 1.970                   | 2.044                      | 1.580                   |
| Pc2       | 25          | 3.212                      | 2.260                   | 3.175                      | 2.020                   |
|           | 50          | 3.296                      | 2.220                   | 3.324                      | 2.830                   |
|           | 75          | 3.210                      | 2.760                   | 3.196                      | 2.520                   |
|           | 100         | 3.159                      | 2.040                   | 3.201                      | 2.010                   |
| Pc3       | 25          | 3.247                      | 3.340                   | 3.236                      | 3.410                   |
|           | 50          | 3.233                      | 3.140                   | 3.188                      | 3.500                   |
|           | 75          | 3.177                      | 3.460                   | 3.199                      | 2.140                   |
|           | 100         | 3.015                      | 2.320                   | 3.042                      | 2.550                   |
| Pc4       | 25          | 3.284                      | 2.340                   | 3.406                      | 1.710                   |
|           | 50          | 3.352                      | 2.100                   | 3.306                      | 2.280                   |
|           | 75          | 3.253                      | 1.310                   | 3.220                      | 0.585                   |
|           | 100         | 3.076                      | 2.720                   | 3.163                      | 1.960                   |
| nPc1      | 25          | 2.859                      | 0.832                   | 2.822                      | 1.330                   |
|           | 50          | 2.762                      | 1.560                   | 2.701                      | 2.070                   |
|           | 75          | 2.881                      | 0.947                   | 2.896                      | 1.260                   |
|           | 100         | 2.765                      | 0.432                   | 2.780                      | 0.835                   |
| nPc2      | 25          | 2.859                      | 0.832                   | 2.822                      | 1.330                   |
|           | 50          | 2.762                      | 1.560                   | 2.701                      | 2.070                   |
|           | 75          | 2.881                      | 9.468                   | 2.896                      | 1.260                   |
|           | 100         | 2.765                      | 0.432                   | 2.780                      | 0.835                   |
| nPc3      | 25          | 2.859                      | 0.832                   | 2.822                      | 1.330                   |
|           | 50          | 2.763                      | 1.560                   | 2.701                      | 2.070                   |
|           | 75          | 2.881                      | 0.947                   | 2.896                      | 1.260                   |
|           | 100         | 2.765                      | 0.432                   | 2.780                      | 0.835                   |

**Table S2.** \* Selected bond lengths (Å), bond angles (degree), dihedral angles, and the symmetry point groups of the studied Pcs and nPcs.

| Geometry Parameters     | Pc1    | Pc2    | Pc3    | Pc4      | nPc1   | nPc2     | nPc3     |
|-------------------------|--------|--------|--------|----------|--------|----------|----------|
| N1-H; N9-H              | 1.013  | 1.013  | 1.014  | 1.014    | 1.015  | 1.014    | 1.014    |
| N3-C4                   | 1.339  | 1.337  | 1.336  | 1.336    | 1.335  | 1.337    | 1.337    |
| N5-C4                   | 1.367  | 1.366  | 1.367  | 1.365    | 1.364  | 1.366    | 1.365    |
| N5-C6                   | 1.361  | 1.366  | 1.364  | 1.365    | 1.364  | 1.365    | 1.365    |
| C6-N7                   | 1.339  | 1.337  | 1.337  | 1.336    | 1.335  | 1.337    | 1.336    |
| N1-C2-N3                | 126.89 | 128.24 | 128.20 | 128.22   | 127.80 | 128.32   | 128.40   |
| N1-C16-N15              | 128.20 | 128.06 | 128.22 | 128.26   | 127.95 | 128.44   | 128.40   |
| N7-C8-N9                | 129.17 | 128.05 | 128.23 | 128.26   | 127.94 | 128.44   | 128.40   |
| N9-C10-N11              | 126.64 | 128.24 | 128.25 | 128.22   | 127.82 | 128.32   | 128.40   |
| N11-C12-N13             | 126.57 | 127.68 | 127.63 | 127.71   | 127.40 | 127.76   | 127.80   |
| N13-C14-N15             | 126.79 | 127.72 | 127.71 | 127.71   | 127.32 | 127.79   | 127.80   |
| C2-N3-C4-N5             | -6.81  | -0.02  | -0.03  | -0.22    | 0.88   | -0.30    | -0.31    |
| N5-C6-N7-C8             | 7.09   | -0.17  | 0.15   | 0.18     | 0.97   | 0.02     | 0.15     |
| N1-C16-N15-C14          | 10.85  | 0.23   | 0.19   | 0.07     | -0.11  | 0.45     | 0.23     |
| N9-C10-N11-C12          | -8.36  | 0.06   | -0.06  | 0.15     | -1.54  | 0.47     | 0.35     |
| ** Symmetry point group | $C_1$  | $C_i$  | $C_s$  | $D_{2h}$ | $C_1$  | $C_{2h}$ | $D_{2h}$ |

\* The selected geometry parameters include only some bond lengths, bond angles and dihedral angles around the common nucleus of the studied Pcs and nPcs. The numbering of atoms displayed in Figure 1 was adopted. \*\* Schoenflies notations were used for the symmetry point groups.

**Table S3.** The Mulliken atomic charges on selected \* non-hydrogen atoms in Pc1, Pc2, Pc3 and Pc4.

| Pc1             |            | Pc2             |            | Pc3             |            | Pc4             |            |
|-----------------|------------|-----------------|------------|-----------------|------------|-----------------|------------|
| Atom            | Charge (e) | Atom            | Charge (e) | Atom            | Charge (e) | Atom            | Charge (e) |
| N <sub>1</sub>  | -0.736     | N <sub>1</sub>  | -0.757     | N <sub>1</sub>  | -0.746     | N <sub>1</sub>  | -0.746     |
| N <sub>3</sub>  | -0.522     | N <sub>3</sub>  | -0.573     | N <sub>3</sub>  | -0.560     | N <sub>3</sub>  | -0.560     |
| N <sub>5</sub>  | -0.658     | N <sub>5</sub>  | -0.675     | N <sub>5</sub>  | -0.662     | N <sub>5</sub>  | -0.662     |
| N <sub>7</sub>  | -0.531     | N <sub>7</sub>  | -0.573     | N <sub>7</sub>  | -0.560     | N <sub>7</sub>  | -0.560     |
| O <sub>1b</sub> | -0.507     | O <sub>1c</sub> | -0.516     | C <sub>1a</sub> | 0.064      | C <sub>1a</sub> | 0.064      |
| C <sub>1a</sub> | 0.010      | C <sub>1a</sub> | 0.061      | C <sub>1b</sub> | -0.182     | C <sub>1b</sub> | -0.182     |
| C <sub>1b</sub> | 0.331      | C <sub>1b</sub> | -0.276     | C <sub>1c</sub> | -0.134     | C <sub>1c</sub> | -0.134     |
| C <sub>1c</sub> | -0.210     | C <sub>1c</sub> | 0.346      | C <sub>5a</sub> | 0.082      | C <sub>5a</sub> | 0.082      |
| C <sub>5a</sub> | 0.021      | C <sub>5a</sub> | -0.075     | C <sub>5b</sub> | -0.194     | C <sub>5b</sub> | -0.194     |
| C <sub>5b</sub> | 0.310      | C <sub>5b</sub> | -0.284     | C <sub>5c</sub> | -0.134     | C <sub>2</sub>  | 0.511      |
| C <sub>5c</sub> | -0.204     | C <sub>5c</sub> | 0.344      | C <sub>2</sub>  | 0.511      | C <sub>4</sub>  | 0.456      |
| C <sub>2</sub>  | 0.519      | C <sub>2</sub>  | 0.509      | C <sub>4</sub>  | 0.456      | -               | -          |
| C <sub>4</sub>  | 0.444      | C <sub>4</sub>  | -0.454     | -               | -          | -               | -          |
| C <sub>6</sub>  | 0.449      | C <sub>6</sub>  | 0.455      | -               | -          | -               | -          |

\* The Mulliken atomic charges are listed for the non-redundant atoms only. Values for equivalent atoms in each molecule differ only by maximum of  $\pm 0.003$ .

**Table S4.** The Mulliken atomic charges on selected \* non-hydrogen atoms in nPc1, nPc2 and nPc3.

| nPc1            |                     | nPc2            |                     | nPc3            |                     |
|-----------------|---------------------|-----------------|---------------------|-----------------|---------------------|
| Atom            | Charge ( <i>e</i> ) | Atom            | Charge ( <i>e</i> ) | Atom            | Charge ( <i>e</i> ) |
| N <sub>1</sub>  | -0.754              | N <sub>1</sub>  | -0.754              | N <sub>1</sub>  | -0.754              |
| N <sub>3</sub>  | -0.544              | N <sub>3</sub>  | -0.564              | N <sub>3</sub>  | -0.563              |
| N <sub>5</sub>  | -0.660              | N <sub>5</sub>  | -0.666              | N <sub>5</sub>  | -0.665              |
| O <sub>1b</sub> | -0.548              | C <sub>1a</sub> | 0.074               | C <sub>1a</sub> | 0.075               |
| C <sub>1a</sub> | 0.031               | C <sub>1b</sub> | -0.277              | C <sub>1b</sub> | -0.274              |
| C <sub>1b</sub> | 0.208               | C <sub>1c</sub> | 0.153               | C <sub>1c</sub> | 0.138               |
| C <sub>1c</sub> | 0.108               | C <sub>1d</sub> | -0.280              | C <sub>1d</sub> | -0.184              |
| C <sub>1d</sub> | -0.193              | C <sub>1e</sub> | 0.183               | C <sub>1e</sub> | -0.137              |
| C <sub>1e</sub> | -0.136              | C <sub>1f</sub> | -0.189              | C <sub>5a</sub> | 0.095               |
| C <sub>1j</sub> | 0.027               | C <sub>1g</sub> | -0.190              | C <sub>5b</sub> | -0.284              |
| C <sub>5a</sub> | 0.048               | C <sub>1h</sub> | 0.141               | C <sub>2</sub>  | 0.516               |
| C <sub>5b</sub> | 0.196               | C <sub>1i</sub> | -0.277              | C <sub>4</sub>  | 0.456               |
| C <sub>5c</sub> | 0.111               | C <sub>1j</sub> | 0.073               | C <sub>8</sub>  | 0.517               |
| C <sub>5g</sub> | -0.196              | C <sub>5a</sub> | 0.093               | -               | -                   |
| C <sub>2</sub>  | 0.526               | C <sub>5b</sub> | -0.286              | -               | -                   |
| C <sub>4</sub>  | 0.461               | C <sub>5c</sub> | 0.141               | -               | -                   |
| C <sub>8</sub>  | 0.527               | C <sub>5d</sub> | -0.192              | -               | -                   |
| -               | -                   | C <sub>5e</sub> | -0.190              | -               | -                   |
| -               | -                   | C <sub>2</sub>  | 0.515               | -               | -                   |
| -               | -                   | C <sub>4</sub>  | 0.455               | -               | -                   |

\* The Mulliken atomic charges are listed for the non-redundant atoms only. Values for equivalent atoms in each molecule differ only by a maximum of  $\pm 0.003$ .



**Table S5.** The condensed Fukui functions,  $f^+$  and  $f^-$  for Pc1, Pc2, Pc3 and Pc4.

| Pc1              |        |        | Pc2              |        |        | Pc3              |        |        | Pc4              |        |        |
|------------------|--------|--------|------------------|--------|--------|------------------|--------|--------|------------------|--------|--------|
| atom             | $f^+$  | $f^-$  | atom             | $f^+$  | $f^-$  | atom             | $f^+$  | $f^-$  | atom             | $f^+$  | $f^-$  |
| N <sub>1</sub>   | -0.010 | 0.005  | N <sub>1</sub>   | -0.012 | 0.006  | N <sub>1</sub>   | -0.014 | 0.005  | N <sub>1</sub>   | -0.013 | 0.005  |
| C <sub>1a</sub>  | 0.005  | 0.001  | C <sub>1a</sub>  | -0.006 | 0.001  | C <sub>1a</sub>  | 0.002  | 0.005  | C <sub>1a</sub>  | -0.001 | 0      |
| C <sub>1b</sub>  | -0.016 | -0.017 | C <sub>1b</sub>  | -0.009 | -0.017 | C <sub>1b</sub>  | -0.016 | -0.020 | C <sub>1b</sub>  | -0.01  | -0.015 |
| O <sub>1b</sub>  | 0.003  | -0.006 | C <sub>1c</sub>  | -0.012 | -0.015 | C <sub>1c</sub>  | 0.000  | 0.000  | C <sub>1c</sub>  | -0.007 | -0.009 |
| C <sub>1c</sub>  | -0.007 | -0.013 | O <sub>1c</sub>  | -0.012 | -0.014 | C <sub>1d</sub>  | -0.005 | -0.005 | C <sub>1d</sub>  | -0.006 | -0.009 |
| C <sub>1d</sub>  | -0.011 | -0.013 | C <sub>1d</sub>  | -0.015 | -0.015 | C <sub>1e</sub>  | -0.006 | -0.008 | C <sub>1e</sub>  | -0.375 | 0.35   |
| C <sub>1e</sub>  | -0.012 | -0.018 | O <sub>1d</sub>  | -0.01  | -0.015 | C <sub>1f</sub>  | -0.006 | -0.008 | C <sub>1f</sub>  | 0.128  | -0.129 |
| O <sub>1e</sub>  | 0.003  | -0.007 | C <sub>1e</sub>  | -0.009 | -0.017 | C <sub>1g</sub>  | -0.005 | -0.005 | C <sub>2</sub>   | -0.023 | -0.04  |
| C <sub>1f</sub>  | -0.008 | 0.001  | C <sub>1f</sub>  | 0.000  | 0.001  | C <sub>1h</sub>  | 0.000  | 0.000  | N <sub>3</sub>   | -0.018 | -0.006 |
| C <sub>2</sub>   | -0.033 | -0.030 | C <sub>2</sub>   | -0.018 | -0.036 | C <sub>1i</sub>  | -0.016 | -0.02  | C <sub>4</sub>   | -0.042 | -0.039 |
| N <sub>3</sub>   | -0.007 | -0.004 | N <sub>3</sub>   | -0.077 | 0.054  | C <sub>1j</sub>  | 0.002  | 0.005  | N <sub>5</sub>   | 0.007  | 0.005  |
| C <sub>4</sub>   | -0.041 | -0.030 | C <sub>4</sub>   | 0.869  | -0.944 | C <sub>2</sub>   | -0.020 | -0.033 | C <sub>5a</sub>  | -0.003 | 0.002  |
| N <sub>5</sub>   | 0.004  | 0.004  | N <sub>5</sub>   | 0.008  | 0.006  | N <sub>3</sub>   | -0.011 | -0.002 | C <sub>5b</sub>  | -0.012 | -0.016 |
| C <sub>5a</sub>  | 0.000  | 0.001  | C <sub>5a</sub>  | -0.003 | 0.002  | C <sub>4</sub>   | -0.037 | -0.032 | C <sub>5c</sub>  | -0.01  | -0.009 |
| C <sub>5b</sub>  | -0.017 | -0.018 | C <sub>5b</sub>  | -0.012 | -0.017 | N <sub>5</sub>   | 0.011  | 0.034  | C <sub>5d</sub>  | -0.01  | -0.009 |
| O <sub>5b</sub>  | 0.000  | -0.006 | C <sub>5c</sub>  | -0.020 | -0.009 | C <sub>5a</sub>  | 0.001  | 0.007  | C <sub>5e</sub>  | -0.012 | -0.015 |
| C <sub>5c</sub>  | -0.013 | -0.012 | O <sub>5c</sub>  | -0.011 | -0.015 | C <sub>5b</sub>  | -0.016 | -0.022 | C <sub>5f</sub>  | -0.003 | 0.002  |
| C <sub>5d</sub>  | -0.015 | -0.013 | C <sub>5d</sub>  | -0.016 | -0.014 | C <sub>5c</sub>  | -0.002 | 0.001  | C <sub>6</sub>   | -0.042 | -0.039 |
| C <sub>5e</sub>  | -0.015 | -0.018 | O <sub>5d</sub>  | -0.013 | -0.014 | C <sub>5d</sub>  | -0.004 | -0.006 | N <sub>7</sub>   | -0.017 | -0.007 |
| O <sub>5e</sub>  | 0.000  | -0.008 | C <sub>5e</sub>  | -0.014 | -0.549 | C <sub>5e</sub>  | -0.007 | -0.008 | C <sub>8</sub>   | -0.023 | -0.04  |
| C <sub>5f</sub>  | -0.008 | 0.001  | C <sub>5f</sub>  | 0.147  | -0.148 | C <sub>5f</sub>  | -0.008 | -0.008 | N <sub>9</sub>   | -0.013 | 0.005  |
| C <sub>6</sub>   | -0.029 | -0.030 | C <sub>6</sub>   | -0.041 | -0.035 | C <sub>5g</sub>  | -0.003 | -0.007 | C <sub>9a</sub>  | -0.002 | 0.002  |
| N <sub>7</sub>   | -0.068 | -0.006 | N <sub>7</sub>   | -0.015 | -0.005 | C <sub>5h</sub>  | -0.002 | 0.001  | C <sub>9b</sub>  | -0.011 | -0.014 |
| C <sub>8</sub>   | -0.013 | -0.030 | C <sub>8</sub>   | -0.022 | -0.036 | C <sub>5i</sub>  | -0.017 | -0.021 | C <sub>9c</sub>  | -0.006 | -0.009 |
| N <sub>9</sub>   | -0.009 | 0.005  | N <sub>9</sub>   | -0.012 | 0.006  | C <sub>5j</sub>  | 0.004  | 0.003  | C <sub>9d</sub>  | -0.007 | -0.015 |
| C <sub>9a</sub>  | -0.006 | 0.000  | C <sub>9a</sub>  | 0.000  | 0.001  | C <sub>6</sub>   | -0.037 | -0.031 | C <sub>9e</sub>  | -0.01  | 0      |
| C <sub>9b</sub>  | -0.013 | -0.014 | C <sub>9b</sub>  | -0.009 | -0.017 | N <sub>7</sub>   | -0.011 | -0.002 | C <sub>9f</sub>  | -0.001 | -0.04  |
| C <sub>9c</sub>  | 0.003  | -0.003 | C <sub>9c</sub>  | -0.015 | -0.015 | C <sub>8</sub>   | -0.022 | -0.031 | C <sub>10</sub>  | -0.023 | -0.006 |
| O <sub>9c</sub>  | -0.011 | -0.012 | O <sub>9c</sub>  | -0.01  | -0.015 | N <sub>9</sub>   | -0.014 | 0.041  | N <sub>11</sub>  | -0.018 | -0.039 |
| C <sub>9d</sub>  | -0.010 | -0.011 | C <sub>9d</sub>  | -0.012 | -0.015 | C <sub>9a</sub>  | 0.002  | 0.005  | C <sub>12</sub>  | -0.042 | 0.005  |
| C <sub>9e</sub>  | -0.010 | -0.014 | O <sub>9d</sub>  | -0.012 | -0.014 | C <sub>9b</sub>  | -0.016 | -0.020 | N <sub>13</sub>  | 0.007  | 0.002  |
| O <sub>9e</sub>  | -0.012 | -0.019 | C <sub>9e</sub>  | 0.018  | -0.017 | C <sub>9c</sub>  | 0.000  | 0.000  | C <sub>13a</sub> | -0.003 | -0.016 |
| C <sub>9f</sub>  | 0.001  | 0.001  | C <sub>9f</sub>  | -0.006 | 0.001  | C <sub>9d</sub>  | -0.005 | -0.005 | C <sub>13b</sub> | -0.012 | -0.009 |
| C <sub>10</sub>  | -0.030 | -0.031 | C <sub>10</sub>  | -0.018 | -0.036 | C <sub>9e</sub>  | -0.006 | -0.008 | C <sub>13c</sub> | -0.01  | -0.009 |
| N <sub>11</sub>  | -0.007 | -0.003 | N <sub>11</sub>  | -0.017 | -0.006 | C <sub>9f</sub>  | -0.006 | -0.008 | C <sub>13d</sub> | -0.01  | -0.015 |
| C <sub>12</sub>  | -0.04  | -0.049 | C <sub>12</sub>  | -0.039 | -0.036 | C <sub>9g</sub>  | -0.005 | -0.005 | C <sub>13e</sub> | -0.012 | 0.002  |
| N <sub>13</sub>  | 0.003  | 0.003  | N <sub>13</sub>  | 0.008  | 0.006  | C <sub>9h</sub>  | 0.000  | 0.000  | C <sub>13f</sub> | -0.003 | -0.039 |
| C <sub>13a</sub> | -0.162 | 0.163  | C <sub>13a</sub> | -0.003 | 0.002  | C <sub>9i</sub>  | -0.016 | -0.02  | C <sub>14</sub>  | -0.042 | -0.007 |
| C <sub>13b</sub> | -0.018 | -0.019 | C <sub>13b</sub> | -0.012 | -0.017 | C <sub>9j</sub>  | 0.002  | 0.005  | N <sub>15</sub>  | -0.017 | -0.04  |
| O <sub>13b</sub> | 0.000  | -0.007 | C <sub>13c</sub> | -0.02  | -0.014 | C <sub>10</sub>  | -0.02  | -0.033 | C <sub>16</sub>  | -0.023 | 0.005  |
| C <sub>13c</sub> | -0.012 | -0.014 | O <sub>13c</sub> | -0.011 | -0.015 | N <sub>11</sub>  | -0.011 | -0.002 | -                | -      | -      |
| C <sub>13d</sub> | -0.015 | -0.013 | C <sub>13d</sub> | -0.016 | -0.014 | C <sub>12</sub>  | -0.037 | -0.032 | -                | -      | -      |
| C <sub>13e</sub> | -0.015 | -0.018 | O <sub>13d</sub> | -0.013 | -0.014 | N <sub>13</sub>  | 0.011  | 0.004  | -                | -      | -      |
| O <sub>13e</sub> | 0.000  | -0.008 | C <sub>13e</sub> | -0.014 | -0.017 | C <sub>13a</sub> | 0.001  | 0.007  | -                | -      | -      |
| C <sub>13f</sub> | -0.008 | 0.001  | C <sub>13f</sub> | -0.003 | 0.002  | C <sub>13b</sub> | -0.016 | -0.022 | -                | -      | -      |
| C <sub>14</sub>  | -0.028 | -0.031 | C <sub>14</sub>  | -0.041 | -0.035 | C <sub>13c</sub> | -0.002 | 0.001  | -                | -      | -      |
| N <sub>15</sub>  | -0.028 | -0.003 | N <sub>15</sub>  | -0.015 | -0.005 | C <sub>13d</sub> | -0.004 | -0.006 | -                | -      | -      |
| C <sub>16</sub>  | -0.014 | -0.030 | C <sub>16</sub>  | -0.022 | -0.036 | C <sub>13e</sub> | -0.007 | -0.008 | -                | -      | -      |

**Table S6.** The condensed Fukui functions,  $f^+$  and  $f^-$  for nPc1, nPc2 and nPc3.

| nPc1            |        |        | nPc2             |        |        | nPc3             |        |        |
|-----------------|--------|--------|------------------|--------|--------|------------------|--------|--------|
| atom            | $f^+$  | $f^-$  | atom             | $f^+$  | $f^-$  | atom             | $f^+$  | $f^-$  |
| N <sub>1</sub>  | -0.014 | 0.005  | N <sub>1</sub>   | -0.015 | 0.006  | N <sub>1</sub>   | -0.014 | 0.005  |
| C <sub>1a</sub> | -0.002 | 0.007  | C <sub>1a</sub>  | 0.003  | 0.004  | C <sub>1a</sub>  | 0.002  | 0.005  |
| C <sub>1b</sub> | -0.015 | -0.022 | C <sub>1b</sub>  | -0.015 | -0.019 | C <sub>1b</sub>  | -0.016 | -0.02  |
| O <sub>1b</sub> | 0.000  | -0.004 | C <sub>1c</sub>  | 0.000  | -0.001 | C <sub>1c</sub>  | 0.000  | 0.000  |
| C <sub>1c</sub> | -0.003 | -0.002 | C <sub>1d</sub>  | -0.007 | -0.008 | C <sub>1d</sub>  | -0.005 | -0.005 |
| C <sub>1d</sub> | -0.002 | -0.007 | C <sub>1e</sub>  | -0.004 | -0.005 | C <sub>1e</sub>  | -0.006 | -0.008 |
| C <sub>1e</sub> | -0.005 | -0.007 | C <sub>1f</sub>  | -0.009 | -0.01  | C <sub>1f</sub>  | -0.006 | -0.008 |
| C <sub>1f</sub> | -0.005 | -0.007 | C <sub>1g</sub>  | -0.004 | -0.005 | C <sub>1g</sub>  | -0.005 | -0.005 |
| C <sub>1g</sub> | -0.002 | -0.007 | C <sub>1h</sub>  | 0.001  | 0.001  | C <sub>1h</sub>  | 0.000  | 0.000  |
| C <sub>1h</sub> | -0.004 | -0.001 | C <sub>1i</sub>  | -0.015 | -0.019 | C <sub>1i</sub>  | -0.016 | -0.020 |
| C <sub>1i</sub> | -0.018 | -0.019 | C <sub>1j</sub>  | 0.003  | 0.004  | C <sub>1j</sub>  | 0.002  | 0.005  |
| O <sub>1i</sub> | 0.001  | -0.005 | C <sub>2</sub>   | -0.02  | -0.031 | C <sub>2</sub>   | -0.020 | -0.033 |
| C <sub>1j</sub> | 0.006  | -0.001 | N <sub>3</sub>   | -0.01  | -0.002 | N <sub>3</sub>   | -0.011 | -0.002 |
| C <sub>2</sub>  | -0.018 | -0.029 | C <sub>4</sub>   | -0.037 | -0.031 | C <sub>4</sub>   | -0.037 | -0.032 |
| N <sub>3</sub>  | -0.011 | -0.002 | N <sub>5</sub>   | 0.011  | 0.005  | N <sub>5</sub>   | 0.011  | 0.034  |
| C <sub>4</sub>  | -0.035 | -0.027 | C <sub>5a</sub>  | 0.003  | 0.005  | C <sub>5a</sub>  | 0.001  | 0.007  |
| N <sub>5</sub>  | 0.1    | 0.004  | C <sub>5b</sub>  | -0.016 | -0.02  | C <sub>5b</sub>  | -0.016 | -0.022 |
| C <sub>5a</sub> | 0.003  | 0.001  | C <sub>5c</sub>  | -0.001 | 0.001  | C <sub>5c</sub>  | -0.002 | 0.001  |
| C <sub>5b</sub> | -0.02  | -0.021 | C <sub>5d</sub>  | -0.003 | -0.005 | C <sub>5d</sub>  | -0.004 | -0.006 |
| O <sub>5b</sub> | -0.002 | -0.005 | C <sub>5e</sub>  | -0.011 | -0.010 | C <sub>5e</sub>  | -0.007 | -0.008 |
| C <sub>5c</sub> | -0.007 | -0.001 | C <sub>5f</sub>  | -0.006 | -0.004 | C <sub>5f</sub>  | -0.008 | -0.008 |
| C <sub>5d</sub> | -0.002 | -0.005 | C <sub>5g</sub>  | -0.006 | -0.009 | C <sub>5g</sub>  | -0.003 | -0.007 |
| C <sub>5e</sub> | -0.007 | -0.006 | C <sub>5h</sub>  | -0.003 | 0.000  | C <sub>5h</sub>  | -0.002 | 0.001  |
| C <sub>5f</sub> | -0.007 | -0.006 | C <sub>5i</sub>  | -0.015 | -0.020 | C <sub>5i</sub>  | -0.017 | -0.021 |
| C <sub>5g</sub> | -0.003 | -0.005 | C <sub>5j</sub>  | 0.002  | 0.004  | C <sub>5j</sub>  | 0.004  | 0.003  |
| C <sub>5h</sub> | -0.005 | -0.004 | C <sub>6</sub>   | -0.036 | -0.031 | C <sub>6</sub>   | -0.037 | -0.031 |
| C <sub>5i</sub> | -0.018 | -0.022 | N <sub>7</sub>   | -0.010 | -0.002 | N <sub>7</sub>   | -0.011 | -0.002 |
| O <sub>5i</sub> | -0.002 | -0.005 | C <sub>8</sub>   | -0.020 | -0.031 | C <sub>8</sub>   | -0.022 | -0.031 |
| C <sub>5j</sub> | -0.001 | 0.005  | N <sub>9</sub>   | -0.015 | 0.006  | N <sub>9</sub>   | -0.014 | 0.041  |
| C <sub>6</sub>  | -0.035 | -0.028 | C <sub>9a</sub>  | 0.003  | 0.004  | C <sub>9a</sub>  | 0.002  | 0.005  |
| N <sub>7</sub>  | -0.011 | -0.002 | C <sub>9b</sub>  | -0.022 | -0.012 | C <sub>9b</sub>  | -0.016 | -0.020 |
| C <sub>8</sub>  | -0.02  | -0.027 | C <sub>9c</sub>  | 0.001  | 0.001  | C <sub>9c</sub>  | 0.000  | 0.000  |
| N <sub>9</sub>  | -0.015 | 0.005  | C <sub>9d</sub>  | -0.004 | -0.005 | C <sub>9d</sub>  | -0.005 | -0.005 |
| C <sub>9a</sub> | 0.006  | -0.002 | C <sub>9e</sub>  | -0.009 | -0.01  | C <sub>9e</sub>  | -0.006 | -0.008 |
| C <sub>9b</sub> | -0.019 | -0.018 | C <sub>9f</sub>  | -0.004 | -0.005 | C <sub>9f</sub>  | -0.006 | -0.008 |
| O <sub>9b</sub> | -0.001 | -0.004 | C <sub>9g</sub>  | -0.007 | -0.008 | C <sub>9g</sub>  | -0.005 | -0.005 |
| C <sub>9c</sub> | -0.001 | -0.005 | C <sub>9h</sub>  | 0      | -0.001 | C <sub>9h</sub>  | 0.000  | 0.000  |
| C <sub>9d</sub> | -0.007 | -0.001 | C <sub>9i</sub>  | -0.015 | -0.019 | C <sub>9i</sub>  | -0.016 | -0.02  |
| C <sub>9e</sub> | -0.005 | -0.007 | C <sub>9j</sub>  | 0.003  | 0.004  | C <sub>9j</sub>  | 0.002  | 0.005  |
| C <sub>9f</sub> | -0.006 | -0.006 | C <sub>10</sub>  | -0.056 | -0.031 | C <sub>10</sub>  | -0.02  | -0.033 |
| C <sub>9g</sub> | -0.007 | -0.002 | N <sub>11</sub>  | -0.01  | -0.002 | N <sub>11</sub>  | -0.011 | -0.002 |
| C <sub>9h</sub> | 0.000  | -0.006 | C <sub>12</sub>  | -0.037 | -0.031 | C <sub>12</sub>  | -0.037 | -0.032 |
| C <sub>9i</sub> | -0.015 | -0.023 | N <sub>13</sub>  | 0.011  | 0.005  | N <sub>13</sub>  | 0.011  | 0.004  |
| O <sub>9i</sub> | -0.001 | -0.004 | C <sub>13a</sub> | 0.003  | 0.005  | C <sub>13a</sub> | 0.001  | 0.007  |
| C <sub>9j</sub> | -0.002 | 0.007  | C <sub>13b</sub> | -0.016 | -0.02  | C <sub>13b</sub> | -0.016 | -0.022 |

Table 6. *Cont.*

| nPc1             |        |        | nPc2             |        |        | nPc3             |        |        |
|------------------|--------|--------|------------------|--------|--------|------------------|--------|--------|
| atom             | $f^+$  | $f^-$  | atom             | $f^+$  | $f^-$  | atom             | $f^+$  | $f^-$  |
| C <sub>10</sub>  | -0.019 | -0.028 | C <sub>13c</sub> | -0.001 | 0.001  | C <sub>13c</sub> | -0.002 | 0.001  |
| N <sub>11</sub>  | -0.011 | -0.001 | C <sub>13d</sub> | -0.003 | -0.005 | C <sub>13d</sub> | -0.004 | -0.006 |
| C <sub>12</sub>  | -0.035 | -0.028 | C <sub>13e</sub> | -0.011 | -0.01  | C <sub>13e</sub> | -0.007 | -0.008 |
| N <sub>13</sub>  | 0.010  | 0.004  | C <sub>13f</sub> | 0.358  | -0.368 | C <sub>13f</sub> | -0.008 | -0.008 |
| C <sub>13a</sub> | 0.002  | 0.002  | C <sub>13g</sub> | -0.006 | -0.009 | C <sub>13g</sub> | -0.003 | -0.007 |
| C <sub>13b</sub> | -0.018 | -0.023 | C <sub>13h</sub> | -0.003 | 0.000  | C <sub>13h</sub> | -0.002 | 0.001  |
| O <sub>13b</sub> | -0.003 | -0.003 | C <sub>13i</sub> | -0.015 | -0.021 | C <sub>13i</sub> | -0.017 | -0.021 |
| C <sub>13c</sub> | -0.007 | -0.001 | C <sub>13j</sub> | -0.002 | 0.009  | C <sub>13j</sub> | 0.004  | 0.003  |
| C <sub>13d</sub> | -0.003 | -0.005 | C <sub>14</sub>  | -0.036 | -0.031 | C <sub>14</sub>  | -0.037 | -0.031 |
| C <sub>13e</sub> | -0.006 | -0.007 | N <sub>15</sub>  | -0.01  | -0.002 | N <sub>15</sub>  | -0.011 | -0.002 |
| C <sub>13f</sub> | -0.007 | -0.006 | C <sub>16</sub>  | -0.02  | -0.031 | C <sub>16</sub>  | -0.022 | -0.031 |
| C <sub>13g</sub> | -0.003 | -0.005 |                  |        |        |                  |        |        |
| C <sub>13h</sub> | -0.004 | -0.004 |                  |        |        |                  |        |        |
| C <sub>13i</sub> | -0.02  | -0.021 |                  |        |        |                  |        |        |
| O <sub>13i</sub> | -0.001 | -0.005 |                  |        |        |                  |        |        |
| C <sub>13j</sub> | 0.000  | 0.003  |                  |        |        |                  |        |        |
| C <sub>14</sub>  | -0.035 | -0.027 |                  |        |        |                  |        |        |
| N <sub>15</sub>  | -0.01  | -0.003 |                  |        |        |                  |        |        |
| C <sub>16</sub>  | -0.02  | -0.027 |                  |        |        |                  |        |        |
